# Supplementary material for: A digital sensor to measure real-time leaf movements and detect abiotic stress in plants
Source: PubMed Central journal article supplement — Plant Physiol. 2021 Aug 30;187(3):1131–48. doi: 10.1093/plphys/kiab407 (PMC8566216; doi:10.1093/plphys/kiab407), 2021-08-30
Supplement: kiab407_supplementary_data.pdf [file kiab407_supplementary_data.pdf]

1 Supplemental Material

2 A digital sensor to measure real-time leaf movements and detect abiotic stress in  
3 plants

4 Geldhof Batist, Pattyn Jolien, Eyland David, Carpentier Sebastien, Van de Poel Bram

5  
6

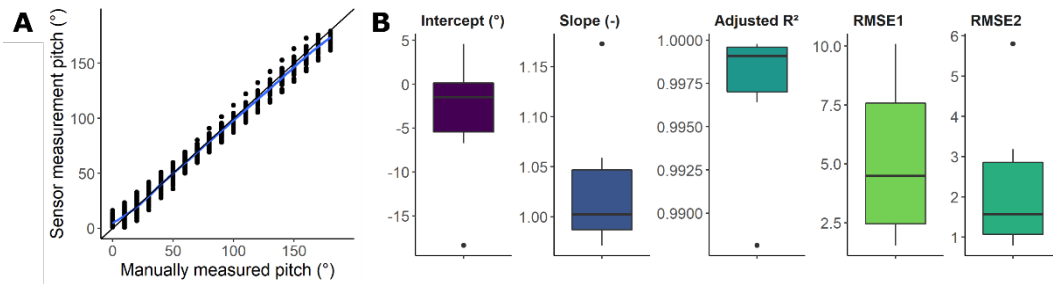

7

8 Supplemental Figure S1: Sensor calibration and accuracy. (A) Angle values of 64 sensors for the pitch ( $\theta$ ) orientation, calibrated  
9 against manual angle measurements using a protractor system. The RMSE of a single linear model fit through all data points  
10 was 4.9°. (B) Boxplot representation of intercept, slope and adjusted  $R^2$  for Individual sensor-specific linear models (center line  
11 = median, box limits = first and third quartile, whiskers = largest and smallest value within 1.5 x interquartile range, individual  
12 points = outliers). RMSE1 was determined for the sensor-to-angle differences and RMSE2 for the deviation of the individual  
13 sensor models from the ground truth.

14

15

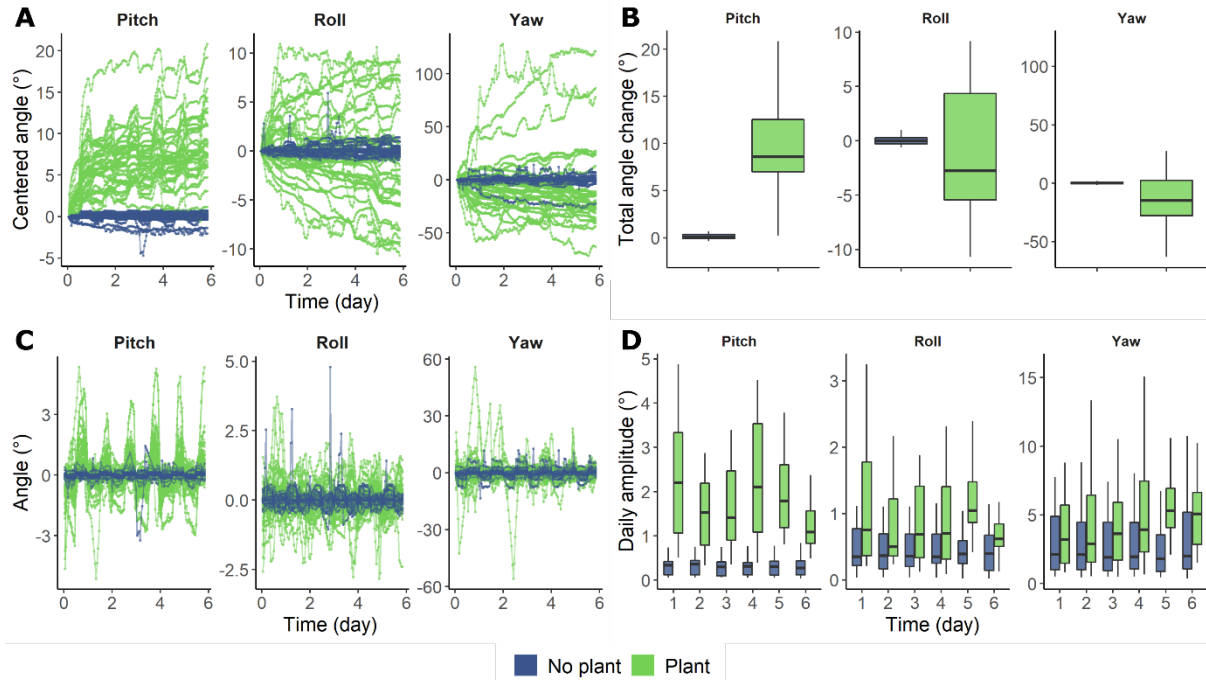

16

17 Supplemental Figure S2: Comparison of steady-state sensor behavior to plant movements. (A) Sensor stability of individual  
 18 sensors for 6 days in steady-state conditions (not attached to a plant leaf) in blue ( $n = 35$ ) as compared to actual angular  
 19 changes of individual sensors attached to banana leaves in green ( $n = 25$ ) for the pitch ( $\theta$ ), roll ( $\varphi$ ) and yaw ( $\psi$ ) movement. (B)  
 20 Boxplots showing total angle change for the pitch, roll and yaw movement over 6 days for the sensors in steady state and the  
 21 sensors attached to a banana leaf (center line = median, box limits = first and third quartile, whiskers = largest and smallest  
 22 value within  $1.5 \times$  interquartile range). (C) Seasonal trend (daily oscillations) of sensors in steady state (blue) and attached to a  
 23 banana leaf (green) and (D) their daily amplitudes, for the pitch ( $\theta$ ), roll ( $\varphi$ ) and yaw ( $\psi$ ) movement.

24

25

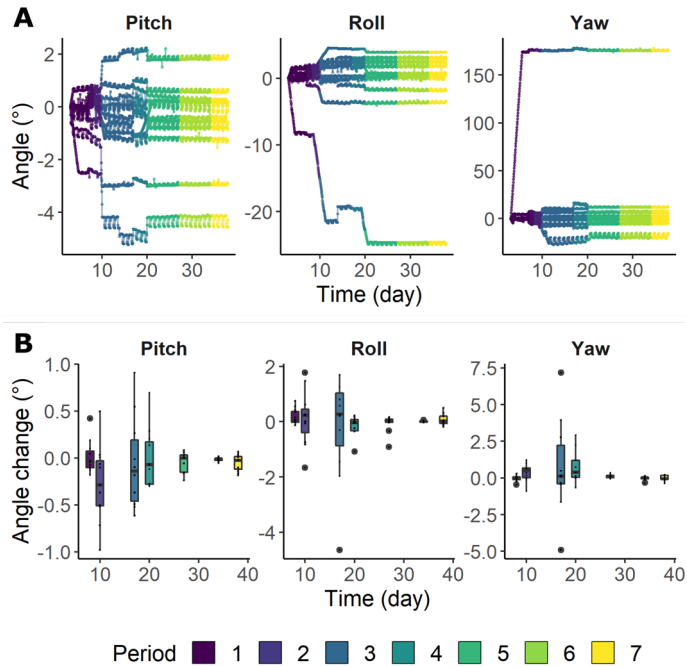

26

27 Supplemental Figure S3: Long-term steady-state sensor stability. (A) Angle data of 12 individual IMU sensors for a period of 34  
 28 days for the pitch ( $\theta$ ), roll ( $\varphi$ ) and yaw ( $\psi$ ) movement. Each color represents a period of undisturbed measurements. The last 14  
 29 days of the sequence, there were no intermittent experiments. (B) Boxplots of the total change of angular orientation within  
 30 the 34 day measurement period (center line = median, box limits = first and third quartile, whiskers = largest and smallest value  
 31 within 1.5 x interquartile range, individual points = outliers). Each boxplot represents the change of the angle during a period of  
 32 undisturbed measurements.

33

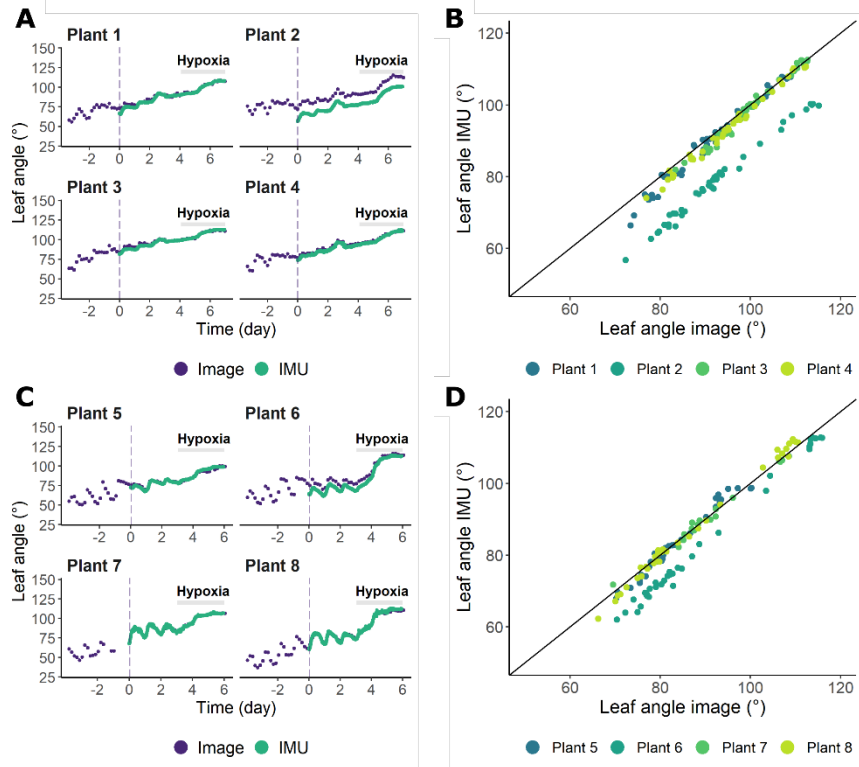

34

35 Supplemental Figure S4: Validation of the sensor pitch movement before and during root hypoxia for tomato (Ailsa Craig). Eight  
 36 plants were monitored during two subsequent imaging periods. (A & C) Time series comparison between image-based leaf  
 37 angle measurements and IMU sensor output. Leaf petioles were first imaged for several days prior to the attachment of the  
 38 IMU sensor to the leaf petiole, to assess the effect of the sensor weight on the leaf movement. The dashed line in (A & C)  
 39 indicates the start of the sensor measurement. (B & D) Correlation between the petiole angle derived from image analysis and  
 40 the leaf angle sensors (mean  $R^2_{adj} = 0.987 \pm 0.007$  and mean RMSE =  $3.92^\circ \pm 4.38^\circ$ ).

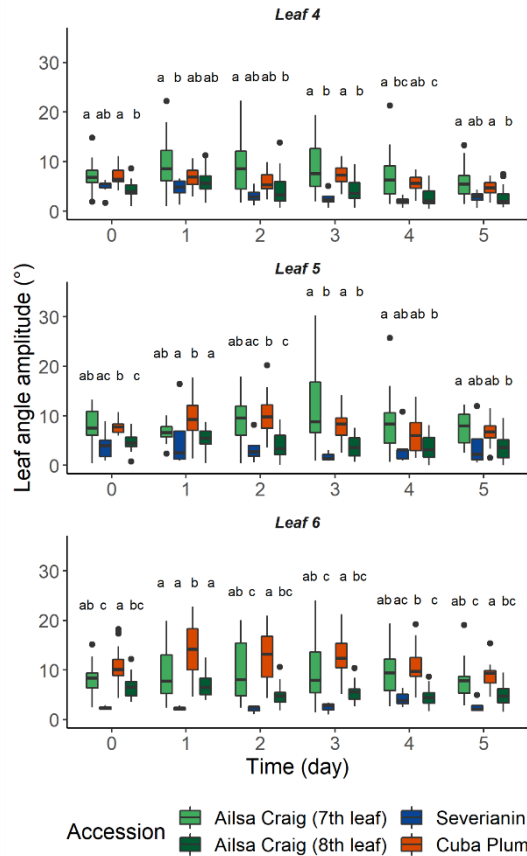

41

42 Supplemental Figure S5: Leaf angle amplitudes of the circadian rhythms of leaves of different ages and different tomato  
 43 accessions. Amplitudes of the pitch movement are shown for leaf 4, 5 and 6 of Ailsa Craig tomato plants of different plant ages  
 44 (7 and 8 leaves on average), and of two other distinct tomato accessions (Severianin and Cuba Plum) for 5 days (n = 10). The  
 45 amplitude was calculated as the daily change of the leaf oscillation, excluding the long-term trend (center line = median, box  
 46 limits = first and third quartile, whiskers = largest and smallest value within 1.5 x interquartile range, individual points =  
 47 outliers). Significant differences between the treatments were determined using a non-parametric Dunn's test with Bonferroni  
 48 correction ( $\alpha = 0.05$ ) and are represented by different letter codes.

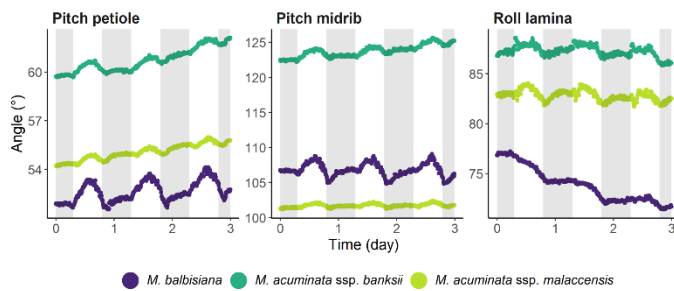

49

50 Supplemental Figure S6: Non-centered data of the circadian leaf movements of different banana genotypes (corresponding to  
 51 Figure 3C). Circadian rhythms of the pitch movement of the leaf petiole and midrib and the roll movement of the leaf lamina in  
 52 a single leaf of three banana genotypes (*Musa balbisiana*, *Musa acuminata ssp. banksii* and *Musa acuminata ssp. malaccensis*).

53

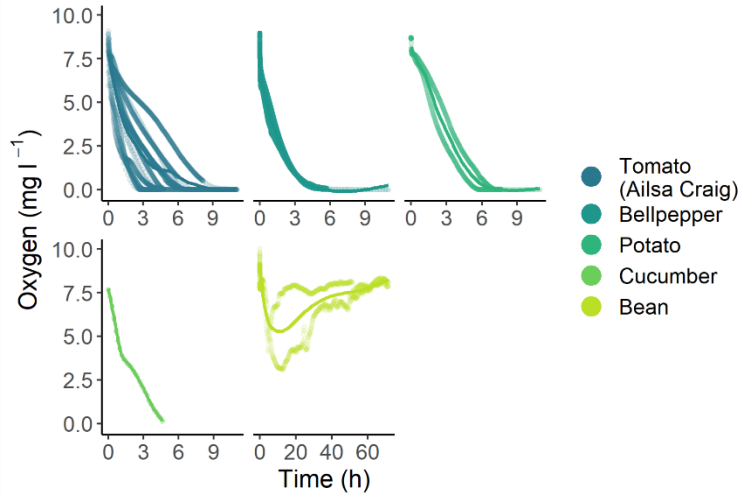

54

55 Supplemental Figure S7: Oxygen consumption in the root zone of individual plants of different species during a waterlogging  
 56 treatment. Lines represent the smoothed model on the raw data.

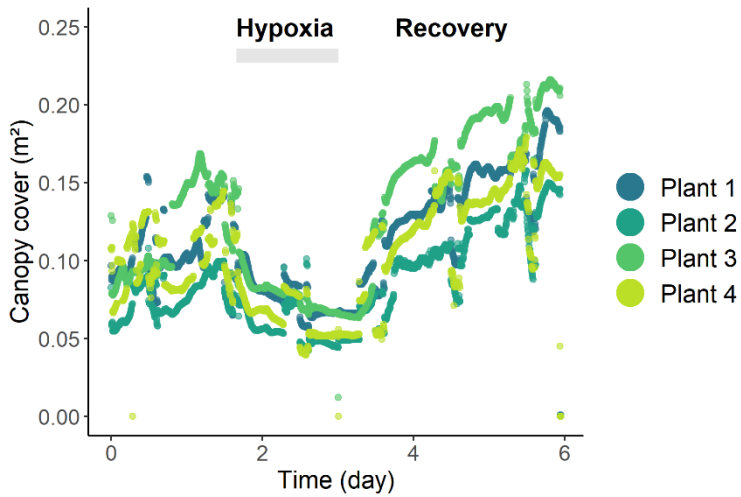

57

58 Supplemental Figure S8: Real-time canopy cover change in Ailsa Craig tomato plants during waterlogging. Data were collected  
 59 for 4 plants (n = 4) during a waterlogging treatment of 32h and the subsequent reoxygenation. Canopy cover was derived as the  
 60 projected leaf surface from top-view images.

61

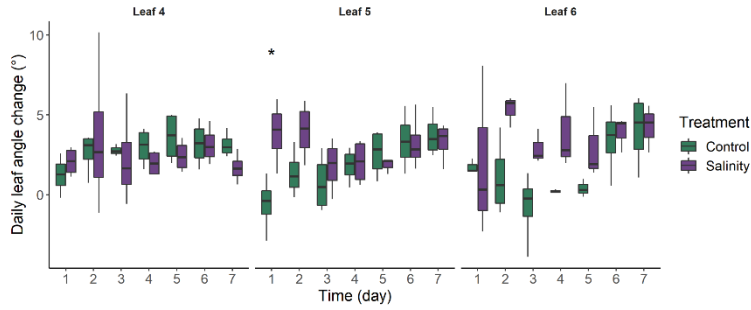

62

63 Supplemental Figure S9: Average daily leaf angle trend change during control and high salinity conditions in tomato (cv. Ailsa  
 64 Craig) (n = 4, EC = 10). Daily leaf angle change is expressed as the difference between subsequent mean daily angles (center line  
 65 = median, box limits = first and third quartile, whiskers = largest and smallest value within 1.5 x interquartile range, individual  
 66 points = outliers). Significant differences between the treatments were determined using a non-parametric Wilcoxon test ( $\alpha =$   
 67 0.05) and are indicated with an asterisk (\*).

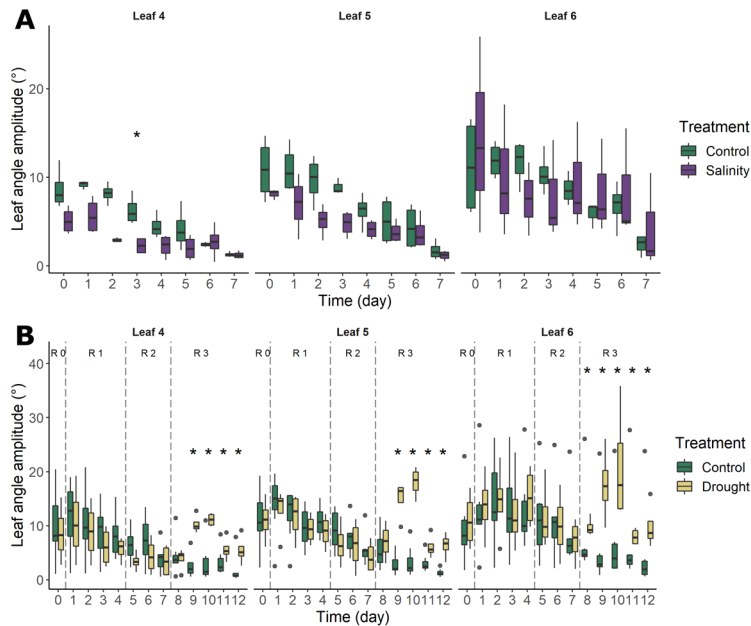

68

69 Supplemental Figure S10: Daily leaf angle amplitudes of leaves of different ages (4<sup>th</sup>, 5<sup>th</sup> and 6<sup>th</sup> leaf) during abiotic stress  
 70 conditions in tomato (cv. Ailsa Craig). The amplitude was calculated as the daily change of the leaf oscillation, excluding the  
 71 long-term trend (center line = median, box limits = first and third quartile, whiskers = largest and smallest value within 1.5 x  
 72 interquartile range, individual points = outliers). (A) Salt treatment with sodium chloride enriched irrigation for seven days (n =  
 73 4; EC = 10); (B) Drought treatment with decreasing watering regimes: R0 = well-watered; R1 = irrigation in the morning and the  
 74 evening; R2 = irrigation in the morning; R3 = no irrigation (n = 4 – 8). Significant differences between the treatments were  
 75 determined using a non-parametric Wilcoxon test ( $\alpha = 0.05$ ) and are indicated with an asterisk (\*).

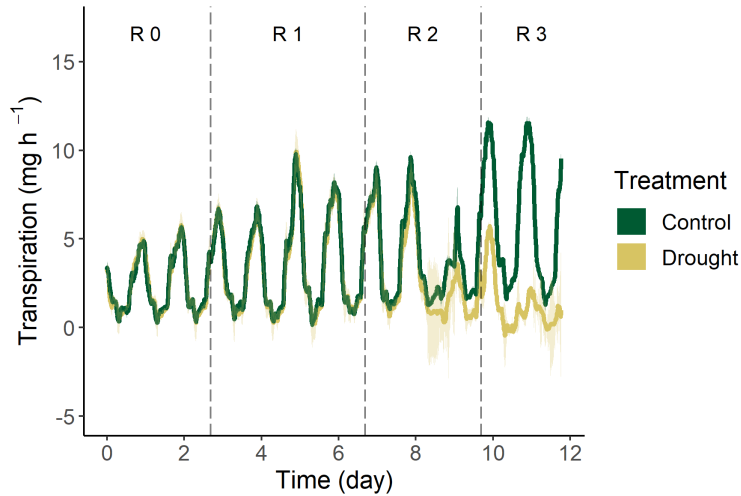

76

77 Supplemental Figure S11: Mean hourly transpiration of tomato (cv. Ailsa Craig) plants during well-watered conditions and  
 78 drought stress, together with the 90 % confidence interval. The drought sequence consisted of 4 regimes (R0 = well-watered;  
 79 R1 = irrigation in the morning and the evening; R2 = irrigation only in the morning; R3 = no irrigation).

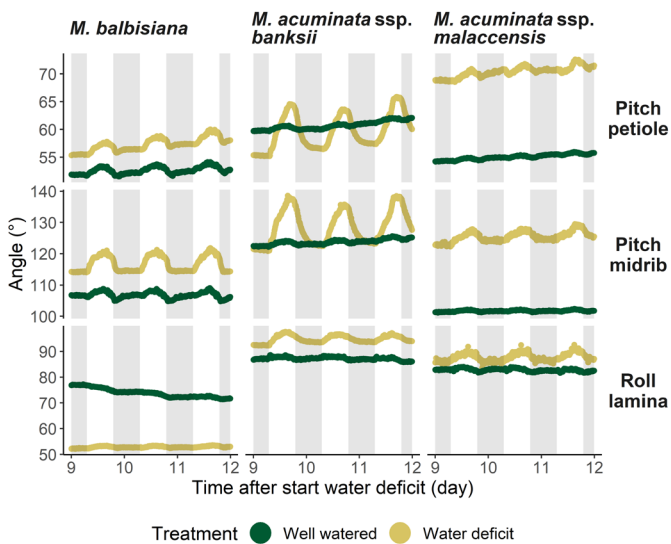

80

81 Supplemental Figure S12: Non-centered data of the circadian leaf movements of banana during drought stress (corresponding  
 82 to Figure 5C). Comparison of the leaf orientation of the petiole, midrib and lamina of a single leaf between three banana  
 83 genotypes (*Musa balbisiana*, *Musa acuminata* ssp. *banksii* and *Musa acuminata* ssp. *malaccensis*) in well-watered (green) and  
 84 water deficit (yellow) conditions.



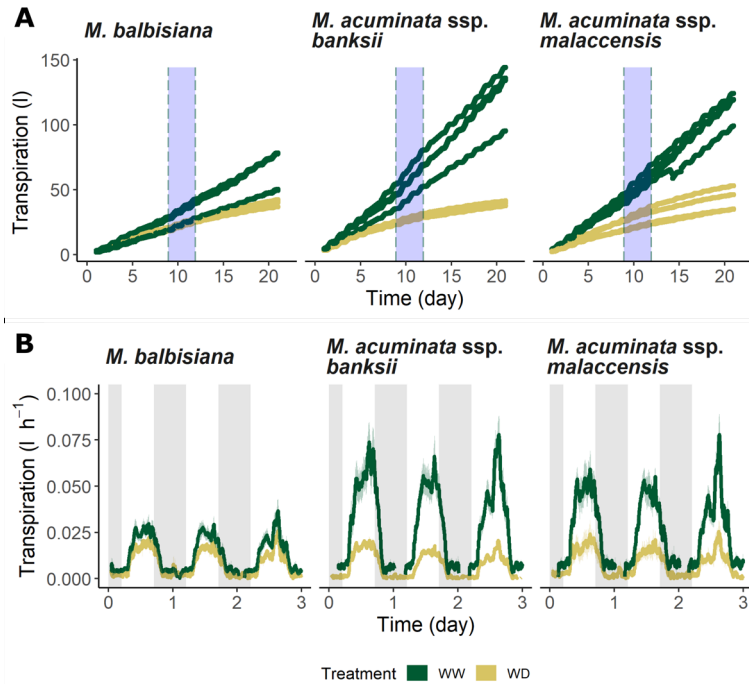

85

86 Supplemental Figure S13: Transpiration of three banana genotypes during well-watered and water deficit conditions. (A)  
 87 Cumulative transpiration for the total duration of the experiment for the three banana genotypes (*Musa balbisiana*, *Musa*  
 88 *acuminata ssp. banksii* and *Musa acuminata ssp. malaccensis*) during well-watered and water deficit conditions (n = 4). The  
 89 shaded region between dashed lines corresponds to the three-day period of leaf angle measurements. (B) Mean hourly  
 90 transpiration of the three banana genotypes during well-watered and water deficit conditions, together with the 90 %  
 91 confidence interval (n = 4). This three day period corresponds to the timeframe of leaf angle measurements presented in Figure  
 92 5.

93

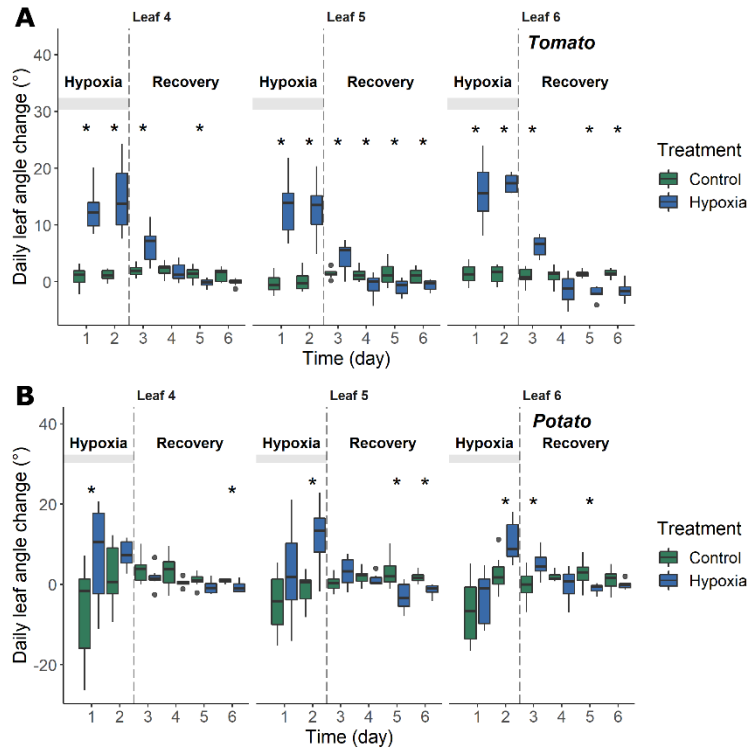

94

95 Supplemental Figure S14: Comparison of the daily leaf angle changes during waterlogging of tomato and potato. (A) Leaves of  
 96 different ages (4<sup>th</sup>, 5<sup>th</sup> and 6<sup>th</sup> leaf) of tomato (cv. Ailsa Craig) (n = 10) and (B) leaves of different ages (9<sup>th</sup>, 10<sup>th</sup> and 10<sup>th</sup> leaf) of  
 97 potato (n = 9). Daily leaf angle change is expressed as the difference between subsequent mean daily angles (center line =  
 98 median, box limits = first and third quartile, whiskers = largest and smallest value within 1.5 x interquartile range, individual  
 99 points = outliers). Significant differences between the treatments were determined using a non-parametric Wilcoxon test ( $\alpha =$   
 100 0.05) and are indicated with an asterisk (\*).

101

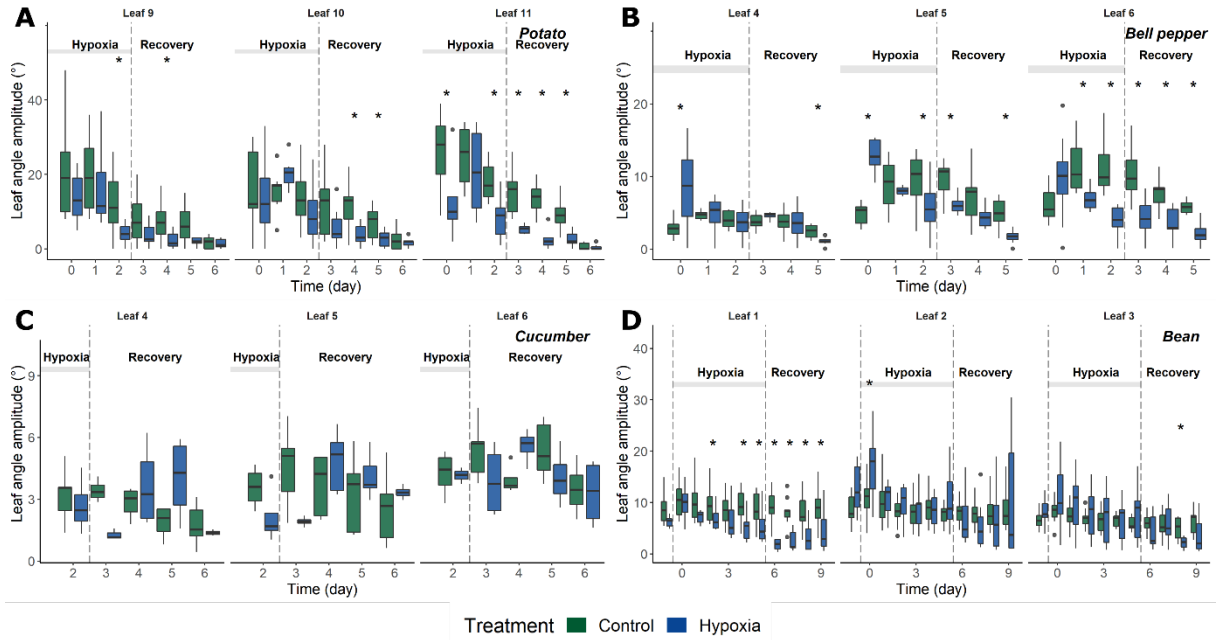

Supplemental Figure S15: Daily leaf angle amplitudes of different aged leaves and in different species during a waterlogging treatment and recovery. The amplitude was calculated as the daily change of the leaf oscillation, excluding the long-term trend (center line = median, box limits = first and third quartile, whiskers = largest and smallest value within 1.5 x interquartile range, individual points = outliers). The amplitude of the daily leaf angle is depicted for (A) potato leaves of different ages (4<sup>th</sup>, 5<sup>th</sup> and 6<sup>th</sup> leaf) (n = 9); (B) bell pepper leaves of different ages (4<sup>th</sup>, 5<sup>th</sup> and 6<sup>th</sup> leaf) (n = 10); (C) cucumber leaves of different ages (4<sup>th</sup>, 5<sup>th</sup> and 6<sup>th</sup> leaf) (n = 5) and (D) bean leaves of different ages 1<sup>th</sup>, 2<sup>nd</sup> and 3<sup>rd</sup> leaf) (n = 10). Significant differences between the treatments were determined using a non-parametric Wilcoxon test ( $\alpha = 0.05$ ) and are indicated with an asterisk (\*).

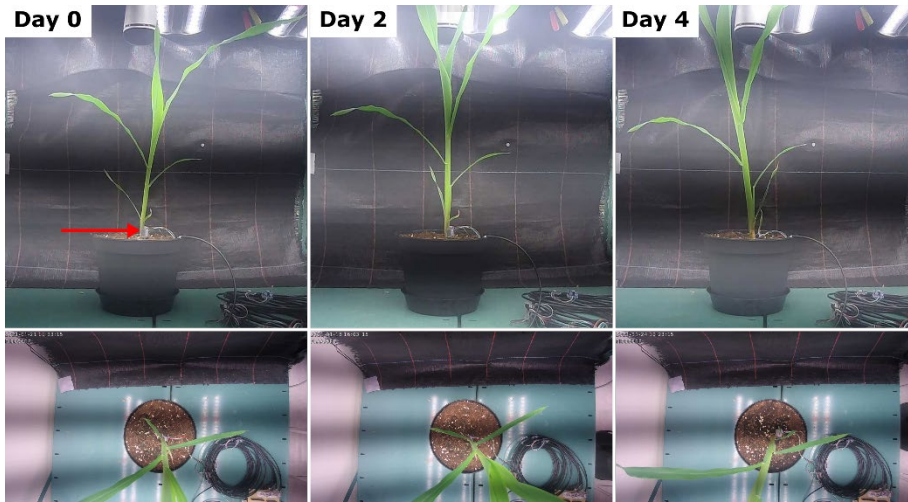

Supplemental Figure S16: Side- and top-view images of the orientation of a single maize plant during 4 days of growth. The sensor was attached to the stem base (red arrow). The maize plant depicted here corresponds to the plant on which stem angle measurements were performed (Figure 8).

111

112

113

114

115
